# Supplementary material
Source: PubMed Central journal article supplement (PMC3099693)
Supplement: supp_M111.223271_Movie_legends.pdf [file supp_M111.223271_Movie_legends.pdf]

Movie 1. Motor dysfunction of *Smad2*-CNS-KO mice at P18.

The *Smad2*-CNS-KO mouse walks with a wide gait and unsteady steps, often losing body balance.

Movie 2. Abnormal posture of *Smad2*-CNS-KO mice at P18.

*Smad2*-CNS-KO mouse walks with tremors. When stopped, compared with control littermates, *Smad2*-CNS-KO mouse spread their hind limbs to maintain body balance.
